# Supplementary material
Source: PubMed Central journal article supplement (PMC6520050)
Supplement: NIHMS1020274-supplement-Supplemental.pdf [file NIHMS1020274-supplement-Supplemental.pdf]

In the format provided by the authors and unedited.

# Poly(GR) impairs protein translation and stress granule dynamics in *C9orf72*-associated frontotemporal dementia and amyotrophic lateral sclerosis

Yong-Jie Zhang<sup>1,2</sup>, Tania F. Gendron<sup>1,2</sup>, Mark T. W. Ebbert<sup>1</sup>, Aliesha D. O'Raw<sup>1</sup>, Mei Yue<sup>1</sup>, Karen Jansen-West<sup>1</sup>, Xu Zhang<sup>3</sup>, Mercedes Prudencio<sup>1,2</sup>, Jeannie Chew<sup>1,2</sup>, Casey N. Cook<sup>1,2</sup>, Lillian M. Daugherty<sup>1</sup>, Jimei Tong<sup>1</sup>, Yuping Song<sup>1</sup>, Sarah R. Pickles<sup>1</sup>, Monica Castanedes-Casey<sup>1</sup>, Aishe Kurti<sup>1</sup>, Rosa Rademakers<sup>1,2</sup>, Bjorn Oskarsson<sup>4</sup>, Dennis W. Dickson<sup>1,2</sup>, Wenqian Hu<sup>3</sup>, Aaron D. Gitler<sup>5</sup>, John D. Fryer<sup>1,2</sup> and Leonard Petrucelli<sup>1,2\*</sup>

---

<sup>1</sup>Department of Neuroscience, Mayo Clinic, Jacksonville, FL, USA. <sup>2</sup>Neurobiology of Disease Graduate Program, Mayo Graduate School, Mayo Clinic College of Medicine, Rochester, MN, USA. <sup>3</sup>Department of Biochemistry and Molecular Biology, Mayo Clinic, Rochester, MN, USA. <sup>4</sup>Department of Neurology, Mayo Clinic, Jacksonville, FL, USA. <sup>5</sup>Department of Genetics, Stanford University School of Medicine, Stanford, CA, USA.

\*e-mail: [petrucelli.leonard@mayo.edu](mailto:petrucelli.leonard@mayo.edu)

## **Poly(GR) impairs protein translation and stress granule dynamics in *C9orf72*-associated frontotemporal dementia and amyotrophic lateral sclerosis**

**Authors:** Yong-Jie Zhang<sup>1,2</sup>, Tania F. Gendron<sup>1,2</sup>, Mark T. W. Ebbert<sup>1</sup>, Aliesha D. O'Raw<sup>1</sup>, Mei Yue<sup>1</sup>, Karen Jansen-West<sup>1</sup>, Xu Zhang<sup>3</sup>, Mercedes Prudencio<sup>1,2</sup>, Jeannie Chew<sup>1,2</sup>, Casey N. Cook<sup>1,2</sup>, Lillian M. Daugherty<sup>1</sup>, Jimei Tong<sup>1</sup>, Yuping Song<sup>1</sup>, Sarah R. Pickles<sup>1</sup>, Monica Castanedes-Casey<sup>1</sup>, Aishe Kurti<sup>1</sup>, Rosa Rademakers<sup>1,2</sup>, Bjorn Oskarsson<sup>4</sup>, Dennis W. Dickson<sup>1,2</sup>, Wenqian Hu<sup>3</sup>, Aaron D. Gitler<sup>5</sup>, John D. Fryer<sup>1,2</sup>, Leonard Petrucelli<sup>1,2,\*</sup>

### **Affiliations:**

<sup>1</sup>Department of Neuroscience, Mayo Clinic, 4500 San Pablo Road, Jacksonville, Florida 32224, USA.

<sup>2</sup>Neurobiology of Disease Graduate Program, Mayo Graduate School, Mayo Clinic College of Medicine, Rochester, Minnesota 55905, USA.

<sup>3</sup>Department of Biochemistry and Molecular Biology, Mayo Clinic, Rochester, Minnesota 55905, USA.

<sup>4</sup>Department of Neurology, Mayo Clinic, 4500 San Pablo Road, Jacksonville FL 32224, USA.

<sup>5</sup>Department of Genetics, Stanford University School of Medicine, Stanford, California 94305, USA.

### **\*Correspondence to:**

Leonard Petrucelli, Ph.D.

Department of Research, Neuroscience

Mayo Clinic College of Medicine

4500 San Pablo road

Jacksonville, FL 32224

Office: 1-904-953-2855

Fax: 1-904-953-6276

e-mail: [petrucelli.leonard@mayo.edu](mailto:petrucelli.leonard@mayo.edu)

## Supplementary Discussion

Here, we show that mice expressing GFP-(GR)<sub>100</sub> throughout the brain developed age-dependent neuron loss, as well as impaired motor and memory skills. In fact, compared to AAV1-GFP-(GA)<sub>50</sub> mice, the characterization of which was previously reported<sup>32</sup>, GFP-(GR)<sub>100</sub> mice exhibited an earlier disease onset and developed more severe neurodegeneration. Whereas 1.5-month-old GFP-(GR)<sub>100</sub> mice exhibited brain atrophy, neuron loss and gliosis, no such abnormalities were present in age-matched GFP-(GA)<sub>50</sub> mice. GFP-(GA)<sub>50</sub> mice did have a reduced brain weight at 6 months of age ( $334.7 \pm 4.339$  mg), but an even greater reduction in brain weight was observed in 6 month-old GFP-(GR)<sub>100</sub> mice ( $274.8 \pm 9.245$  mg;  $P < 0.0001$ , two-tailed unpaired t test). These findings are consistent with previous studies demonstrating that poly(GR) is more toxic than poly(GA)<sup>33</sup>.

The observed neurodegeneration and behavioral deficits in GFP-(GR)<sub>100</sub> mice were accompanied by the colocalization of cytoplasmic poly(GR) with ribosomal subunits and the translation initiation factor eIF3 $\eta$ , which was also observed in the cortex of c9FTD/ALS patients. Given that TDP-43 pathology is a hallmark feature of c9FTD/ALS, we also examined whether poly(GR) expression causes such pathology. Inclusions of phosphorylated TDP-43 were rarely observed in GFP-(GR)<sub>100</sub> mice (only ~1–3 cells per sagittal hemibrain section showed TDP-43 pathology; **Supplementary Fig. 11a**). In contrast, frequent phosphorylated TDP-43 inclusions were seen in mice expressing (G<sub>4</sub>C<sub>2</sub>)<sub>66</sub>, which produced G<sub>4</sub>C<sub>2</sub> RNA foci and DPR proteins<sup>27</sup>, suggesting that induction of TDP-43 pathology requires G<sub>4</sub>C<sub>2</sub> RNA or aggregated DPR proteins. *C9orf72* repeat expansions are also reported to disrupt nucleocytoplasmic trafficking by impairing nuclear membrane integrity and the localization of RanGAP1<sup>4,17,24,32</sup>. Staining for lamins A/C and B1 revealed no defects in nuclear envelope integrity, nor was

RanGAP1 mislocalized in poly(GR)-positive cells in comparison to poly(GR)-negative cells (**Supplementary Fig. 11b**). These findings are in line with a study showing a normal distribution of RanGAP1 and Lamin B1 in poly(GR)-positive cells of the motor cortex and spinal cord of c9ALS patients<sup>16</sup>.

Poly(GR) has additionally been shown to cause nucleolar stress by suppressing ribosomal RNA (rRNA) synthesis<sup>19-21</sup>. While colocalization of poly(GR) and the nuclear marker fibrillarin was observed in HEK293T cells expressing high levels of GFP-(GR)<sub>100</sub> (**Supplementary Fig. 11c**), poly(GR) did not colocalize with the nucleolar marker fibrillarin in GFP-(GR)<sub>100</sub> mice (**Supplementary Fig. 11d**), which is consistent with the absence of detectable nucleolar poly(GR) in c9FTD/ALS<sup>16,45,46</sup>. Combined with the fact that the expression of rRNAs was not altered in GFP-(GR)<sub>100</sub> mice (**Supplementary Fig. 11e,f**), these data argue against nucleolar poly(GR) playing a role in c9FTD/ALS. Nonetheless, it remains possible that relatively short poly(GR) peptides, difficult to detect by immunohistochemistry, are produced in c9FTD/ALS and cause nucleolar stress.

To examine whether poly(GR) aggregates, TDP-43 pathology, defects in nucleocytoplasmic transport and/or nucleolar stress may have developed in GFP-(GR)<sub>100</sub> mice prior to 1.5 months of age, and thus contributed to the neuronal loss observed at this time-point, we examined 1-week-old GFP-(GR)<sub>100</sub> mice. At this age, GFP-(GR)<sub>100</sub> mice showed no significant changes in brain weight or gross morphology compared to age-matched GFP mice (**Supplementary Fig. 12a,b**). Likewise, no poly(GR) inclusions, TDP-43 pathology, RanGAP1, Lamin B1 or Lamin A/C mislocalization, or nucleolar distribution of poly(GR) were detected (**Supplementary Fig. 12c-f**). Together, these data demonstrate that poly(GR) caused neurodegeneration in vivo independently of TDP-43 pathology, nucleocytoplasmic transport defects, and nucleolar stress.

## Supplementary Discussion References

4. Zhang, K., *et al.* The C9orf72 repeat expansion disrupts nucleocytoplasmic transport. *Nature* **525**, 56-61 (2015).
16. Saberi, S., *et al.* Sense-encoded poly-GR dipeptide repeat proteins correlate to neurodegeneration and uniquely co-localize with TDP-43 in dendrites of repeat-expanded C9orf72 amyotrophic lateral sclerosis. *Acta Neuropathol* **135**, 459-474 (2018).
17. Jovicic, A., *et al.* Modifiers of C9orf72 dipeptide repeat toxicity connect nucleocytoplasmic transport defects to FTD/ALS. *Nat Neurosci* **18**, 1226-1229 (2015).
19. Kwon, I., *et al.* Poly-dipeptides encoded by the C9orf72 repeats bind nucleoli, impede RNA biogenesis, and kill cells. *Science* **345**, 1139-1145 (2014).
20. Lee, K.H., *et al.* C9orf72 Dipeptide Repeats Impair the Assembly, Dynamics, and Function of Membrane-Less Organelles. *Cell* **167**, 774-788 e717 (2016).
21. Tao, Z., *et al.* Nucleolar stress and impaired stress granule formation contribute to C9orf72 RAN translation-induced cytotoxicity. *Hum Mol Genet* **24**, 2426-2441 (2015).
24. Freibaum, B.D., *et al.* GGGGCC repeat expansion in C9orf72 compromises nucleocytoplasmic transport. *Nature* **525**, 129-133 (2015).
27. Chew, J., *et al.* Neurodegeneration. C9ORF72 repeat expansions in mice cause TDP-43 pathology, neuronal loss, and behavioral deficits. *Science* **348**, 1151-1154 (2015).
32. Zhang, Y.J., *et al.* C9ORF72 poly(GA) aggregates sequester and impair HR23 and nucleocytoplasmic transport proteins. *Nat Neurosci* **19**, 668-677 (2016).
33. Mizielinska, S., *et al.* C9orf72 repeat expansions cause neurodegeneration in *Drosophila* through arginine-rich proteins. *Science* **345**, 1192-1194 (2014).
45. Schludi, M.H., *et al.* Distribution of dipeptide repeat proteins in cellular models and C9orf72 mutation cases suggests link to transcriptional silencing. *Acta Neuropathol* (2015).
46. Vatsavayai, S.C., *et al.* Timing and significance of pathological features in C9orf72 expansion-associated frontotemporal dementia. *Brain* **139**, 3202-3216 (2016).

**Supplementary Figure 1.**

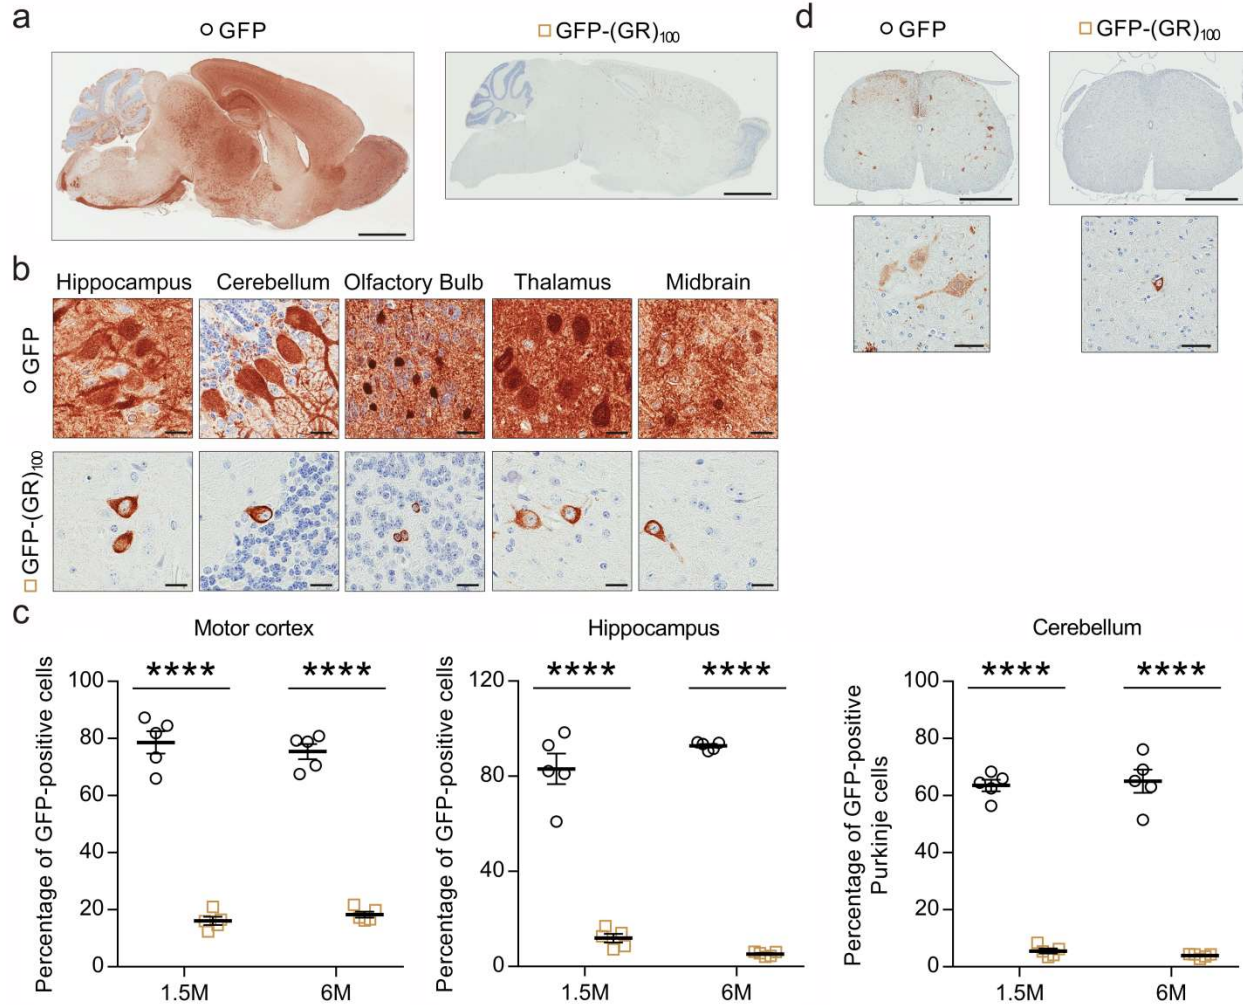

**Supplementary Figure 1. Regional distribution of transgene in brains of GFP and GFP-(GR)<sub>100</sub> mice.** (a) Gross morphological analysis with GFP staining of brains from 6-month-old mice expressing GFP ( $n = 12$ ) or GFP-(GR)<sub>100</sub> ( $n = 9$ ). Scale bar, 2 mm. (b) Immunohistochemical analysis of the indicated brain regions of 6-month-old mice expressing GFP ( $n = 12$ ) or GFP-(GR)<sub>100</sub> ( $n = 9$ ) with anti-GFP antibody. Scale bars, 20  $\mu$ m. (c) Quantification of the percentage of GFP-positive cells in the motor cortex or CA1–CA3 regions of the hippocampus, and GFP-positive Purkinje cells in the cerebellum of 1.5- and 6-month-old GFP and GFP-(GR)<sub>100</sub> mice ( $n = 5$  per group). (d) Immunohistochemical analysis of GFP in the

spinal cord of 6-month-old mice expressing GFP ( $n = 6$ ) or GFP-(GR)<sub>100</sub> ( $n = 5$ ) with anti-GFP antibody. Images of low (top) and high (bottom) magnification are shown. Scale bars, 600  $\mu\text{m}$  (top), 50  $\mu\text{m}$  (bottom). Data are presented as mean $\pm$ s.e.m. In **c**: \*\*\*\*  $P < 0.0001$ , two-way ANOVA, Tukey's multiple-comparison test.

## Supplementary Figure 2

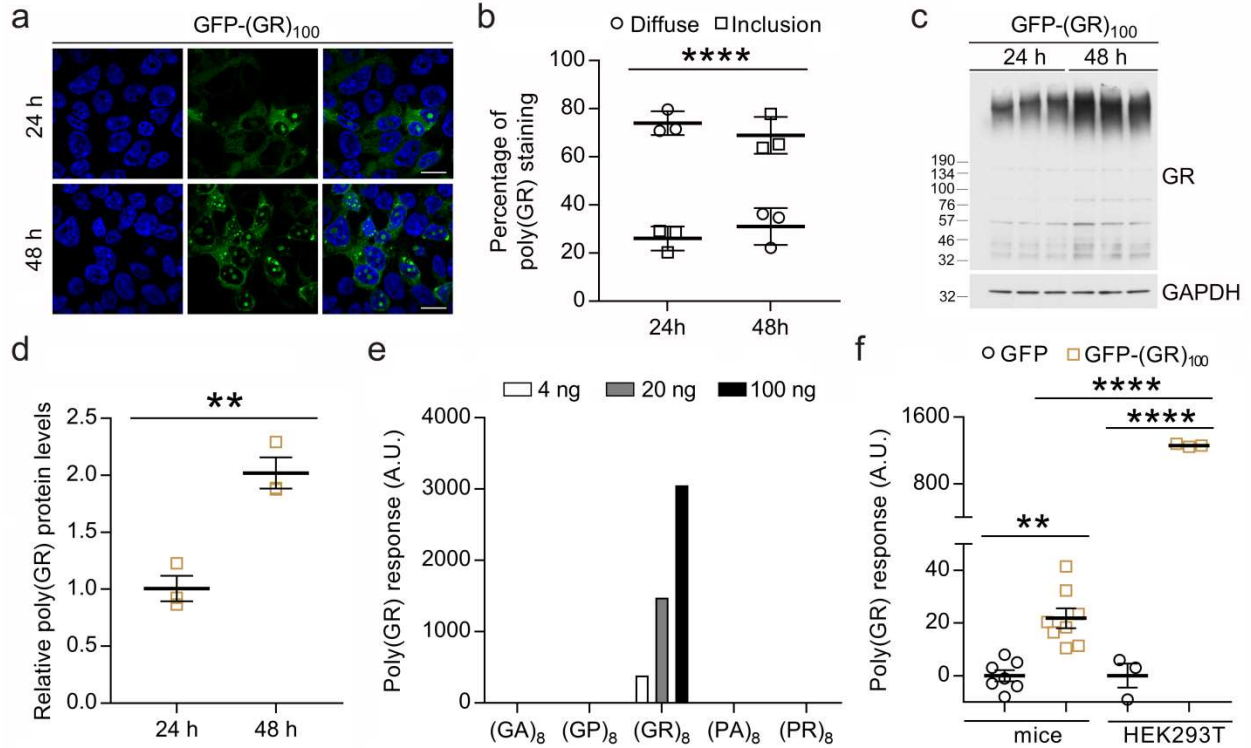

**Supplementary Figure 2. Expression of GFP-(GR)<sub>100</sub> led to the formation of cytoplasmic aggregates in a time- and concentration-dependent manner.** (a,b) Representative images (a) and quantification (b) of HEK293T cells with cytoplasmically diffuse or aggregated GFP-(GR)<sub>100</sub> 24 or 48 h post-transfection ( $n = 3$  independent experiments). Scale bars, 10  $\mu\text{m}$ . (c,d) Immunoblots (c) and densitometric analysis of immunoblots (d) to examine protein levels of GFP-(GR)<sub>100</sub> in HEK293T cells expressing GFP-(GR)<sub>100</sub> 24 or 48 h post-transfection ( $n = 3$  independent experiments). (e) An immunoassay for poly(GR) was developed that detects poly(GR) peptides but not peptides representing the other DPRs RAN translated from the *C9orf72* repeat expansion. (f) The poly(GR) immunoassay was used to measure poly(GR) in the cortex and hippocampus of 6-month-old mice expressing GFP ( $n = 7$ ) or GFP-(GR)<sub>100</sub> ( $n = 8$ ), and in HEK293T cells expressing GFP or GFP-(GR)<sub>100</sub> 24 h post-transfection ( $n = 3$  independent experiments). Data are presented as mean $\pm$ s.e.m. In b: \*\*\*\*  $P < 0.0001$  (24 h inclusion vs. 48 h



inclusion), two-way ANOVA, Tukey's multiple-comparison test. In **d**: \*\*  $P = 0.0046$ , two-tailed unpaired t test. In **f**: \*\*\*\*  $P < 0.0001$  and \*\*  $P = 0.0037$ , one-way ANOVA, Tukey's multiple-comparison test.

### Supplementary Figure 3

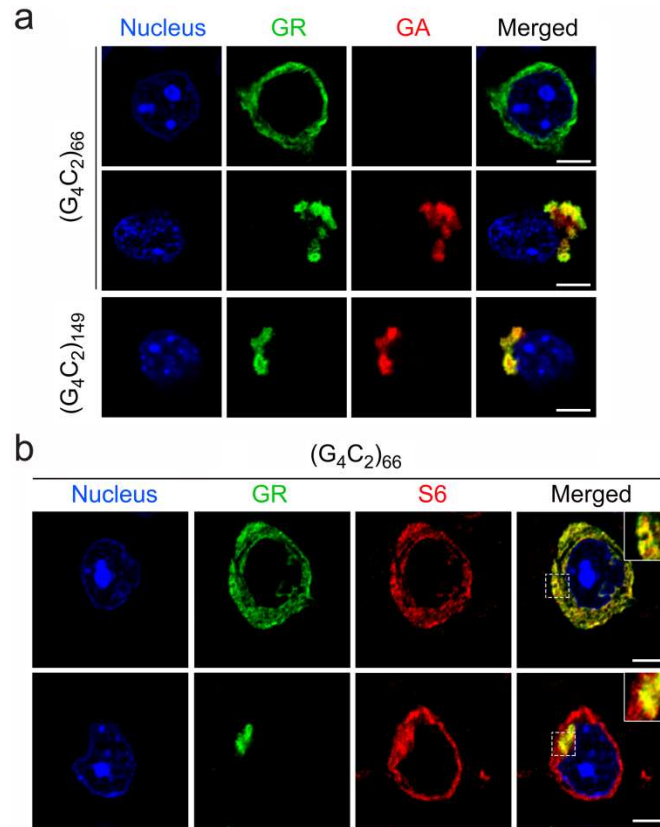

**Supplementary Figure 3. Poly(GR) co-localized with poly(GA) and ribosomal proteins in  $(G_4C_2)_{66}$  and  $(G_4C_2)_{149}$  mice.** (a) Double-immunofluorescence staining for poly(GR) and poly(GA) in the cortex of 6-month-old  $(G_4C_2)_{66}$  and  $(G_4C_2)_{149}$  mice ( $n = 3$  per group). (b) Double-immunofluorescence staining for poly(GR) and the ribosomal protein S6 in the cortex of 6-month-old  $(G_4C_2)_{66}$  mice ( $n = 3$ ). All scale bars, 5  $\mu$ m.

### Supplementary Figure 4

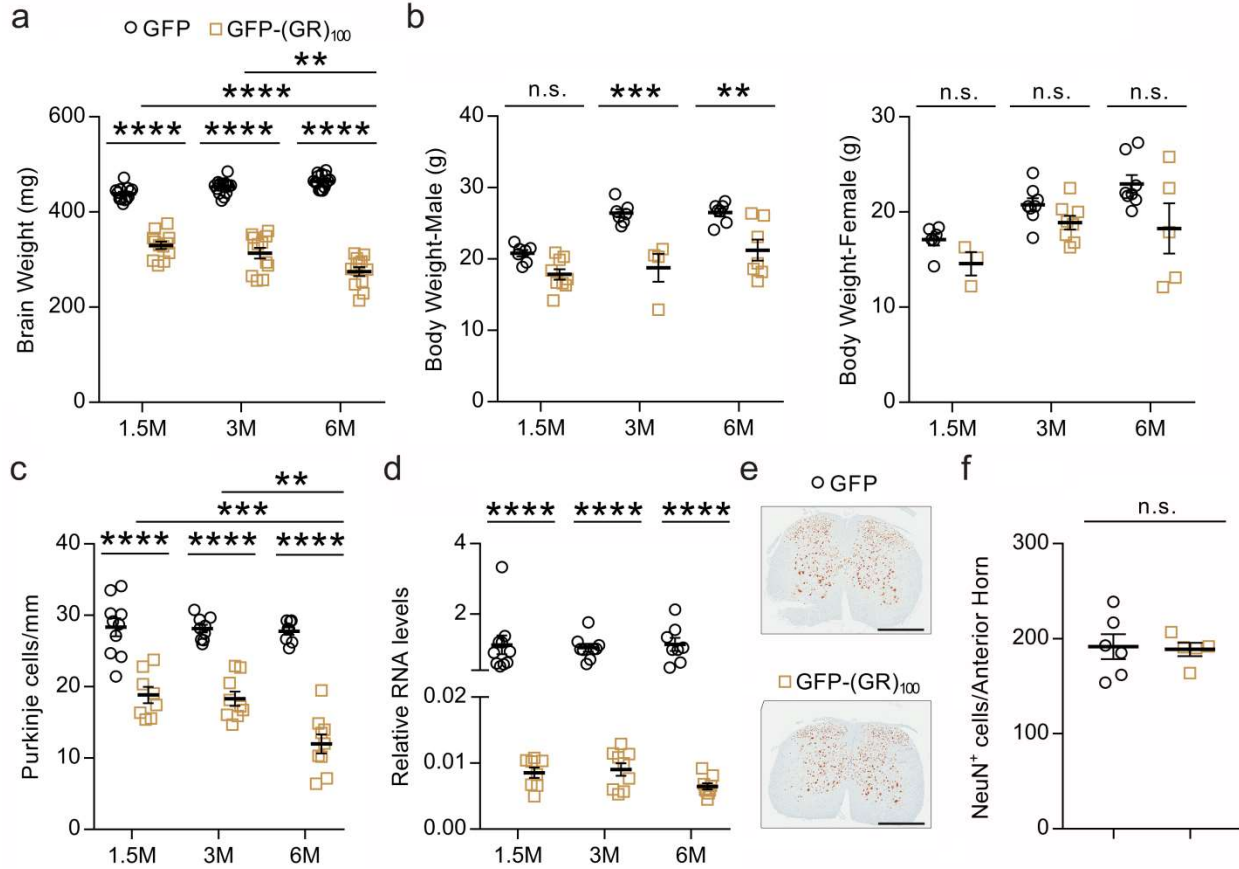

**Supplementary Figure 4. GFP-(GR)<sub>100</sub> mice developed neurodegeneration.** (a) Mean brain weight of 1.5-, 3- and 6-month-old mice expressing GFP ( $n = 13, 15, 15$ , respectively) or GFP-(GR)<sub>100</sub> ( $n = 12$  per group). (b) Mean body weight of 1.5-, 3- and 6-month-old male mice expressing GFP ( $n = 7$  per group) or GFP-(GR)<sub>100</sub> ( $n = 9, 4, 7$ , respectively); or of 1.5-, 3- and 6-month-old female mice expressing GFP ( $n = 6, 8, 8$ , respectively) or GFP-(GR)<sub>100</sub> ( $n = 3, 8, 5$ , respectively). (c) Quantification of the number of Purkinje cells within an annotated area of the cerebellum of 1.5-, 3- and 6-month-old mice expressing GFP ( $n = 10, 9, 8$ , respectively) or GFP-(GR)<sub>100</sub> ( $n = 8, 9, 9$ , respectively). (d) Quantitative real-time PCR analysis of transgene RNA using RNA extracted from the cortex and hippocampus of 1.5-, 3- and 6-month-old mice expressing GFP ( $n = 10, 9, 8$ , respectively) or GFP-(GR)<sub>100</sub> ( $n = 8, 9, 9$ , respectively). (e,f)

Representative images (**e**) and quantification of NeuN-labeled cells in the spinal cord (**f**) of 6-month-old mice expressing GFP ( $n = 6$ ) or GFP-(GR)<sub>100</sub> ( $n = 5$ ). Scale bars, 600  $\mu\text{m}$ . Data are presented as mean $\pm$ s.e.m. In **a**: \*\*\*\*  $P < 0.0001$  and \*\*  $P = 0.0037$ , two-way ANOVA, Tukey's multiple-comparison test. In **b**: \*\*\*  $P = 0.0002$ , \*\*  $P = 0.0038$ , n.s. (left to right)  $P = 0.1806$ ,  $P = 0.8080$ ,  $P = 0.7772$  and  $P = 0.0715$ , two-way ANOVA, Tukey's multiple-comparison test. In **c**: \*\*\*\*  $P < 0.0001$ , \*\*\*  $P = 0.0006$  and \*\*  $P = 0.0012$ , two-way ANOVA, Tukey's multiple-comparison test. In **d**: \*\*\*\*  $P < 0.0001$ , two-way ANOVA, Tukey's multiple-comparison test. In **f**: n.s.  $P = 0.8607$ , two-tailed unpaired t test. n.s., not significant.

### Supplementary Figure 5

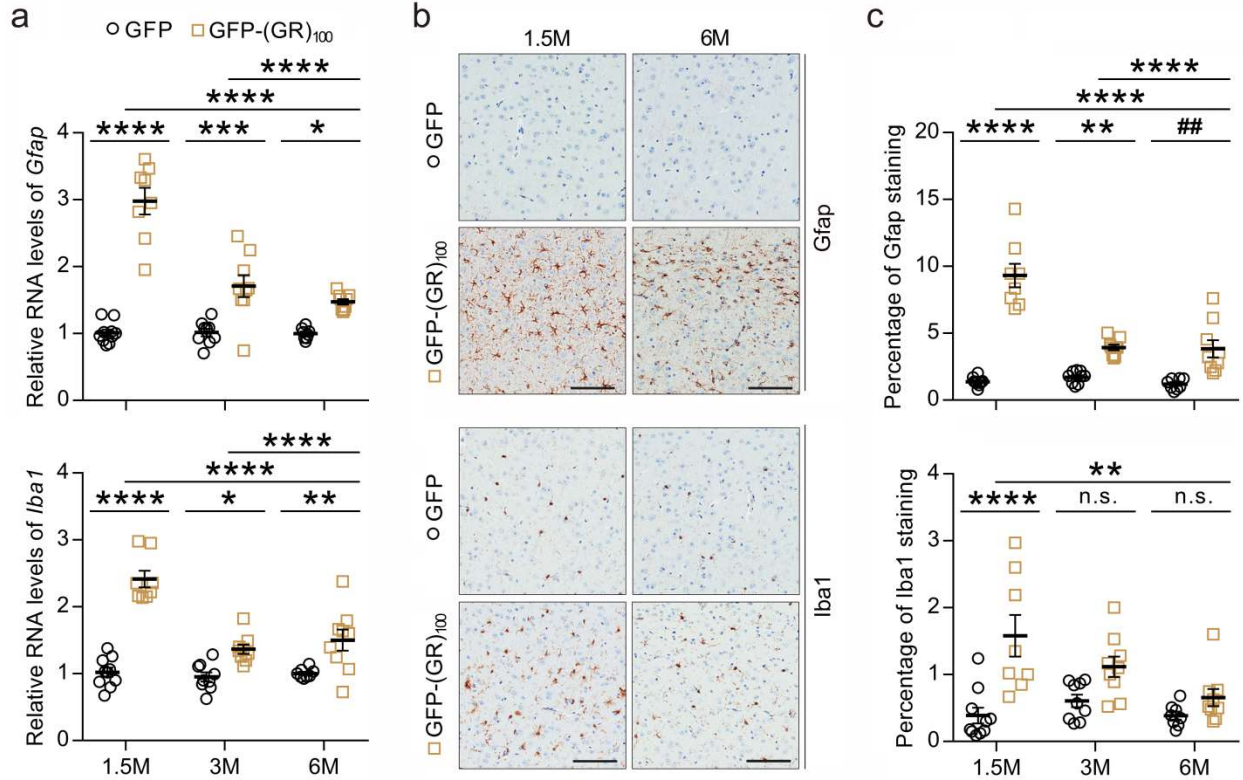

**Supplementary Figure 5. GFP-(GR)<sub>100</sub> mice developed gliosis.** (a) Quantitative real-time PCR analysis of relative RNA levels of the astrocyte marker *Gfap* (top) and the microglia marker *Iba1* (bottom) using RNA extracted from the cortex and hippocampus of 1.5-, 3- and 6-month-old mice expressing GFP ( $n = 10, 9, 8$ , respectively) or GFP-(GR)<sub>100</sub> ( $n = 8, 9, 9$ , respectively). (b) Representative images of Gfap (top) or Iba1 (bottom) staining in the cortex of 1.5- and 6-month-old mice expressing GFP ( $n = 10, 8$ , respectively) or GFP-(GR)<sub>100</sub> ( $n = 8, 9$ , respectively). Scale bars, 100  $\mu$ m. (c) Quantification of astrogliosis (top) and microgliosis (bottom), analyzed by measuring Gfap- or Iba1-positivity in the cortex of 1.5-, 3- and 6-month-old mice expressing GFP ( $n = 10, 9, 8$ , respectively) or GFP-(GR)<sub>100</sub> ( $n = 8, 9, 9$ , respectively) using a positive pixel count algorithm. Data are presented as mean $\pm$ s.e.m. In **a**: top, \*\*\*\*  $P < 0.0001$ , \*\*\*  $P = 0.0004$  and \*  $P = 0.0404$ , two-way ANOVA, Tukey's multiple-comparison test; bottom, \*\*\*\*  $P <$

0.0001, \*\*  $P = 0.0088$  and \*  $P = 0.0353$ , two-way ANOVA, Tukey's multiple-comparison test. In **c**: top, \*\*\*\*  $P < 0.0001$ , \*\*  $P = 0.0095$  and <sup>##</sup>  $P = 0.0018$ , two-way ANOVA, Tukey's multiple-comparison test; bottom, \*\*\*\*  $P < 0.0001$ , \*\*  $P = 0.0024$  and n.s. (left to right)  $P = 0.2138$  and  $P = 0.8467$ , two-way ANOVA, Tukey's multiple-comparison test. n.s., not significant.

## Supplementary Figure 6

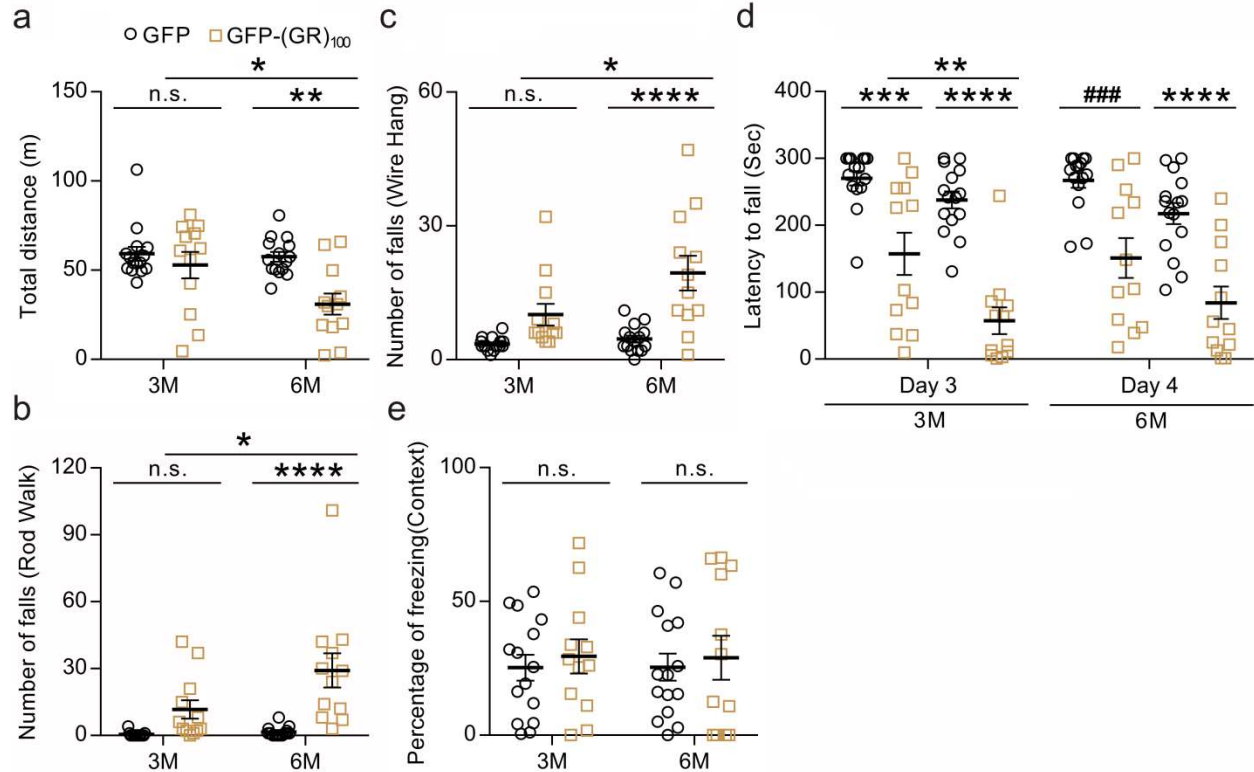

### Supplementary Figure 6. GFP-(GR)<sub>100</sub> mice developed motor and cognitive deficits. (a)

Results from the open field test analyzing the behavior of 3- and 6-month-old mice expressing GFP ( $n = 15$  per group) or GFP-(GR)<sub>100</sub> ( $n = 12$  per group), where locomotive defects were indicated by a decrease in total distance traveled. (b,c) Results from the rod walk (b) and wire hang (c) tests analyzing motor function of 3- and 6-month-old mice expressing GFP ( $n = 15$  per group) or GFP-(GR)<sub>100</sub> ( $n = 12$  per group) by evaluating the number of falls. (d) Day 3 and day 4 results from a four day rotarod test used to determine motor deficits of 3- and 6-month-old mice expressing GFP ( $n = 15$  per group) or GFP-(GR)<sub>100</sub> ( $n = 12$  per group) by evaluating latency to fall from a rotating rod (see also **Fig. 1h** for day 1 and day 2 results). (e) In the contextual fear conditioning test, associative learning and memory of mice expressing GFP ( $n = 15$  per group) or GFP-(GR)<sub>100</sub> ( $n = 12$  per group) were evaluated by the percent of time mice spent frozen in response to being placed in the environment that had previously been paired with a foot shock.

Data are presented as mean±s.e.m. In **a**: \*\*  $P = 0.0024$ , \*  $P = 0.0241$  and n.s.  $P = 0.8094$ , two-way ANOVA, Tukey's multiple-comparison test. In **b**: \*\*\*\*  $P < 0.0001$ , \*  $P = 0.0205$  and n.s.  $P = 0.1859$ , two-way ANOVA, Tukey's multiple-comparison test. In **c**: \*\*\*\*  $P < 0.0001$ , \*  $P = 0.0217$  and n.s.  $P = 0.1280$ , two-way ANOVA, Tukey's multiple-comparison test. In **d**: \*\*\*\*  $P < 0.0001$ , \*\*\*  $P = 0.0006$ , ###  $P = 0.0004$  and \*\*  $P = 0.0051$ , two-way ANOVA, Tukey's multiple-comparison test. In **e**: n.s. (left to right)  $P = 0.9610$  and  $P = 0.9766$ , two-way ANOVA, Tukey's multiple-comparison test. n.s., not significant.



## Supplementary Figure 7

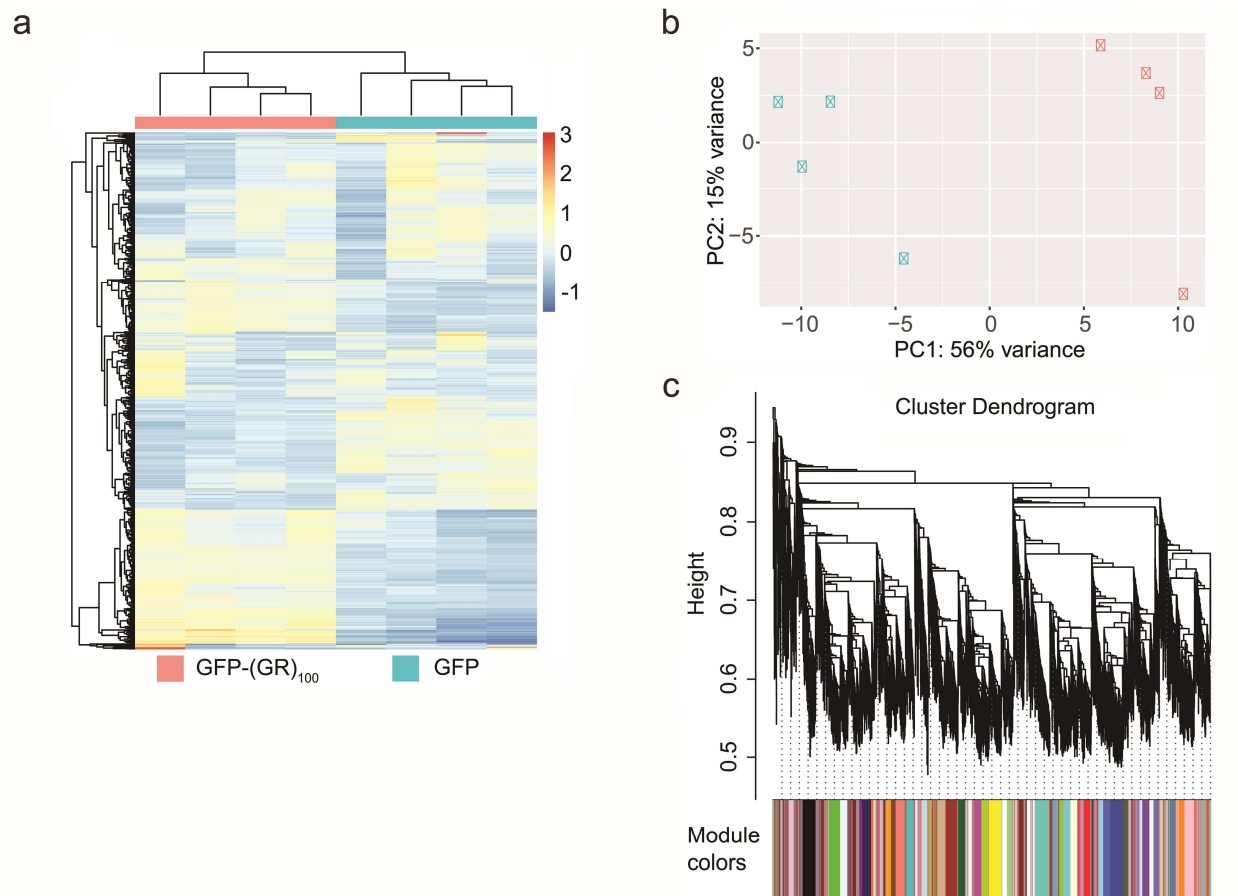

**Supplementary Figure 7. Transcriptome alterations were identified in brains of mice expressing GFP-(GR)<sub>100</sub>.** (a) Hierarchical clustering of the 1000 most variable genes between 1.5-month-old GFP and GFP-(GR)<sub>100</sub> mice ( $n = 4$  per group). (b) Principal-component analyses to determine divergence between 1.5-month-old GFP and GFP-(GR)<sub>100</sub> mice ( $n = 4$  per group). (c) Gene modules identified in brains of 1.5-month-old mice expressing GFP-(GR)<sub>100</sub> ( $n = 4$ ) through weighted gene-coexpression correlation network analyses using differentially-expressed genes.

**Supplementary Figure 8.**

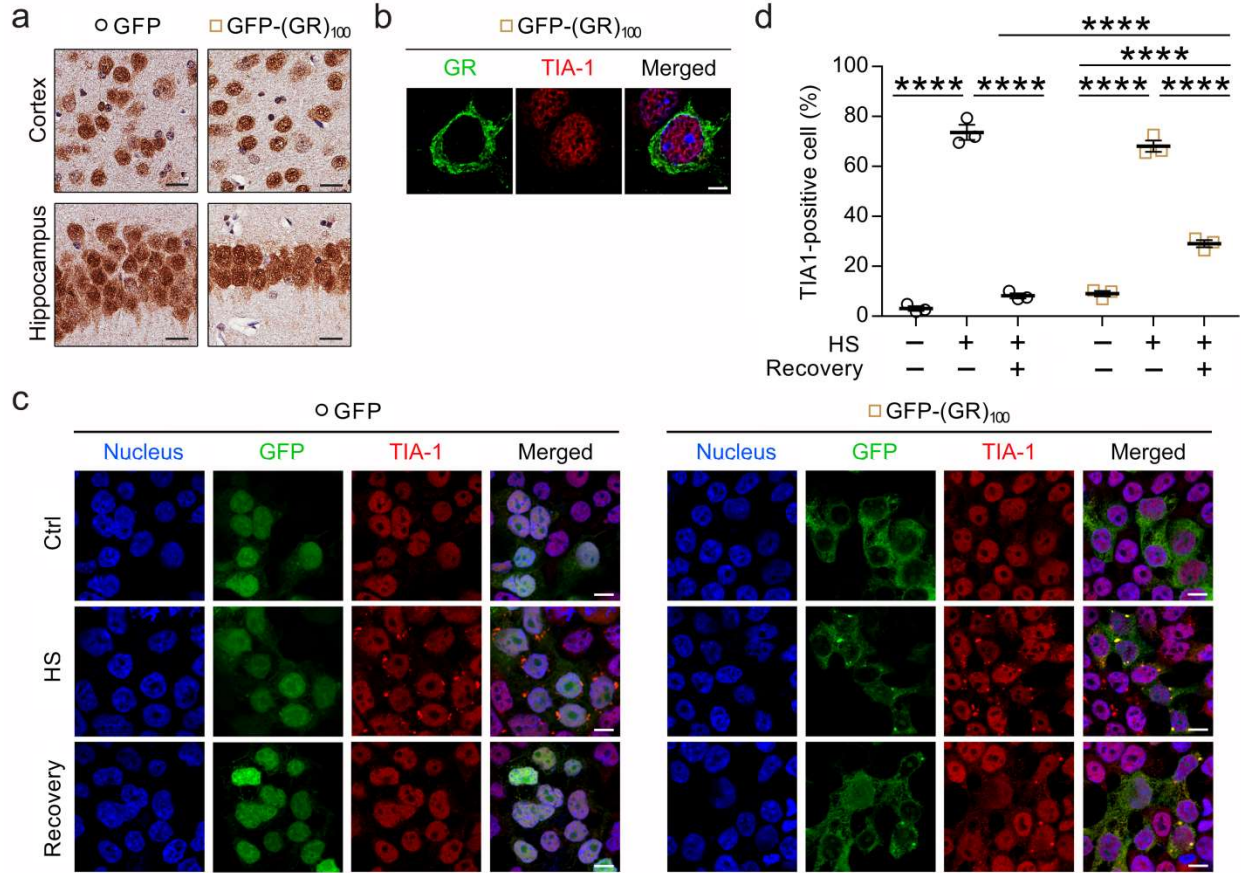

**Supplementary Figure 8. Diffuse GFP-(GR)<sub>100</sub> was recruited into stress granules formed in response to heat shock, and impaired their disassembly during the recovery phase. (a)** Immunohistochemical analysis of TIA-1 in the cortex and hippocampus of 6-month-old mice expressing GFP or GFP-(GR)<sub>100</sub> ( $n = 3$  per group). Scale bars, 20  $\mu\text{m}$ . **(b)** Double-immunofluorescence staining for poly(GR) and TIA-1 in the cortex of 6-month-old mice expressing GFP-(GR)<sub>100</sub> ( $n = 3$ ). Scale bars, 5  $\mu\text{m}$ . **(c)** Double-immunofluorescence staining for TIA-1 and either GFP or GFP-(GR)<sub>100</sub> in HEK293T cells expressing GFP or diffuse GFP-(GR)<sub>100</sub> under basal (Ctrl), heat shock (HS) or post-heat shock conditions (Recovery) ( $n = 3$  independent experiments). **(d)** Quantification of the percentage of GFP- or GFP-(GR)<sub>100</sub>-expressing HEK293T cells containing TIA-1-positive stress granules under basal, heat shock (HS)

or post-heat shock conditions (Recovery) ( $n = 3$  independent experiments). Scale bars, 10  $\mu\text{m}$ . Data are presented as mean $\pm$ s.e.m. In **b**: \*\*\*\*  $P < 0.0001$ , two-way ANOVA, Tukey's multiple-comparison test.

## Supplementary Figure 9.

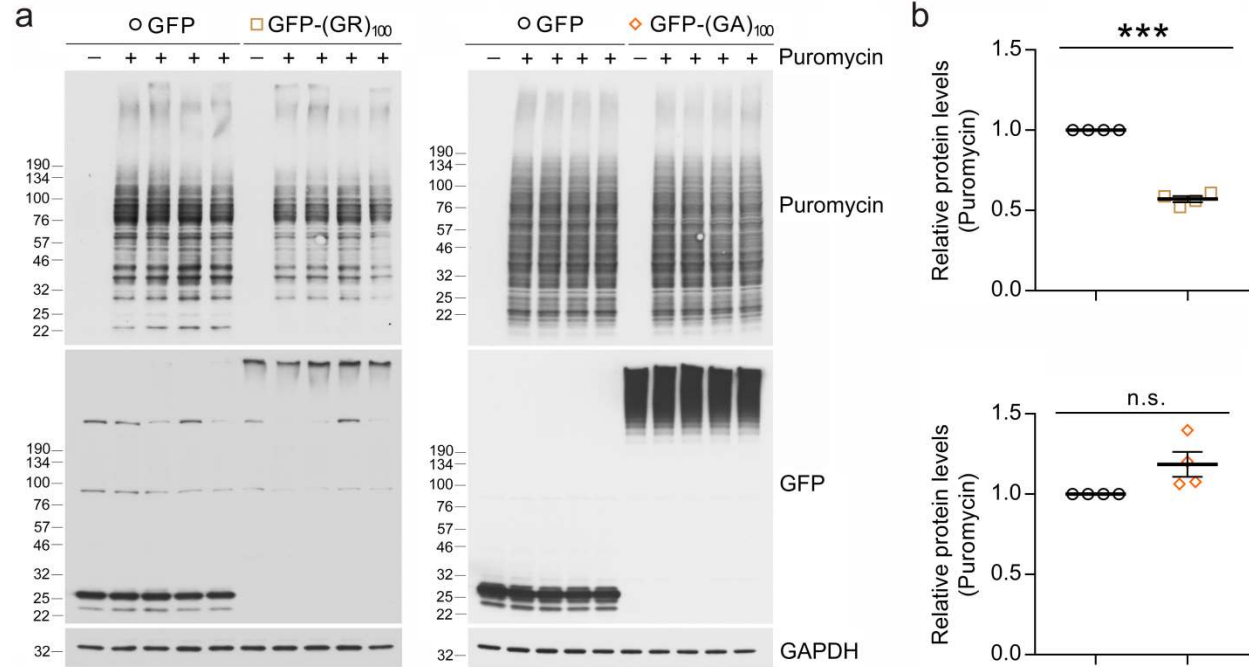

**Supplementary Figure 9. Expression of GFP-(GR)<sub>100</sub>, but not GFP-(GA)<sub>100</sub>, impaired canonical translation. (a,b)** Immunoblots (a) and densitometric analysis of immunoblots (b) for the indicated proteins to examine the production of nascent proteins labeled with puromycin in HEK293T cells expressing GFP versus GFP-(GR)<sub>100</sub> ( $n = 4$  independent experiments), and GFP versus GFP-(GA)<sub>100</sub> ( $n = 4$  independent experiments). Data are presented as mean $\pm$ s.e.m. In b: \*\*\*\*  $P < 0.0001$  and n.s.  $P = 0.0540$ , two-tailed unpaired t test. n.s., not significant.

**Supplementary Figure 10.**

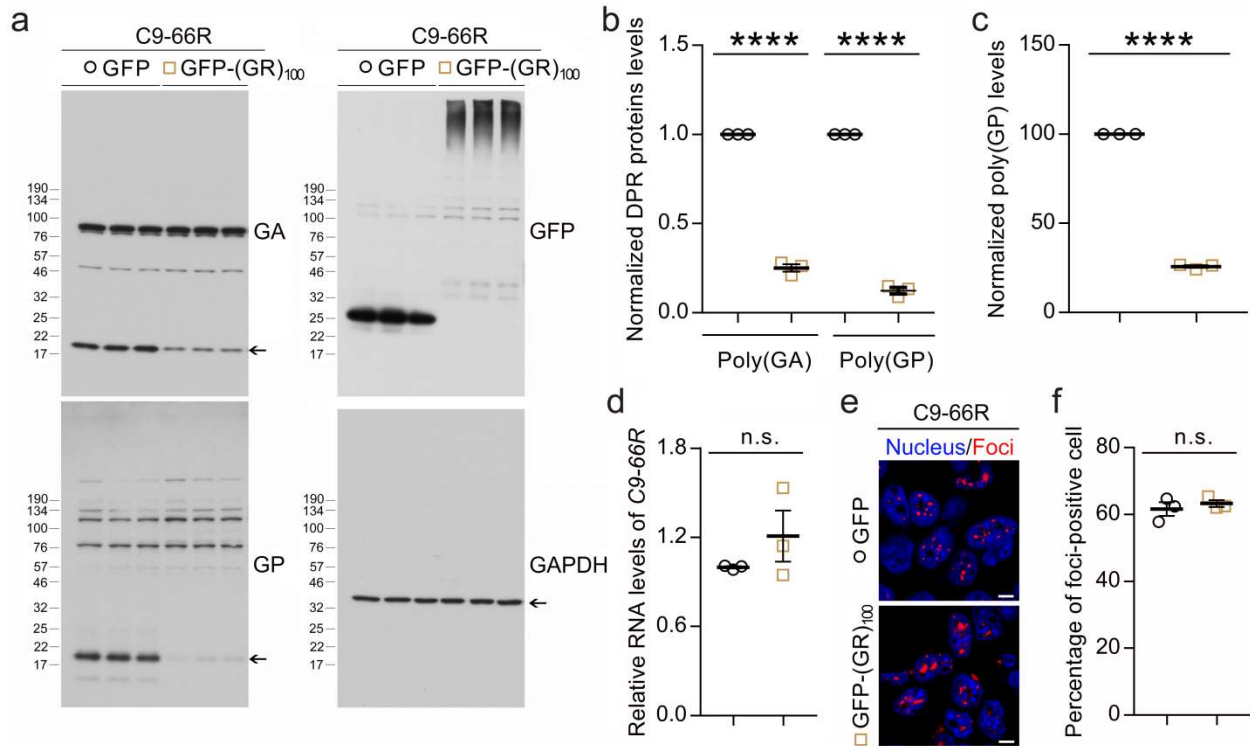

**Supplementary Figure 10. Expression of GFP-(GR)<sub>100</sub> inhibited repeat-associated non-ATG translation of *C9orf72* G<sub>4</sub>C<sub>2</sub> repeat expansions.** (a,b) Full Western blots from Fig. 4h (a) and densitometric analysis (b) of immunoblots for poly(GA) and poly(GP) RAN translated in HEK293T cells co-expressing (G<sub>4</sub>C<sub>2</sub>)<sub>66</sub> and either GFP or GFP-(GR)<sub>100</sub> (*n* = 3 independent experiments). Arrows indicate bands from cropped blots shown in Fig. 4h. (c) Levels of RAN translated poly(GP) in HEK293T cells co-expressing (G<sub>4</sub>C<sub>2</sub>)<sub>66</sub> and either GFP or GFP-(GR)<sub>100</sub>, as assessed by immunoassay (*n* = 3 independent experiments). (d) Quantitative real-time PCR analysis of relative RNA levels of (G<sub>4</sub>C<sub>2</sub>)<sub>66</sub> (C9-66R) in HEK293T cells co-expressing (G<sub>4</sub>C<sub>2</sub>)<sub>66</sub> and either GFP or GFP-(GR)<sub>100</sub> (*n* = 3 independent experiments). (e) RNA FISH to detect nuclear foci containing G<sub>4</sub>C<sub>2</sub> repeat RNA in HEK293T cells co-expressing (G<sub>4</sub>C<sub>2</sub>)<sub>66</sub> (C9-66R) and either GFP or GFP-(GR)<sub>100</sub> (*n* = 3 independent experiments). Scale bars, 5 μm. (f) Quantitation of the percentage of cells containing nuclear RNA foci (*n* = 3 independent

experiments). Data are presented as mean $\pm$ s.e.m. In **b** and **c**: \*\*\*\*  $P < 0.0001$ , two-tailed unpaired t test. In **d**: n.s.  $P = 0.2898$ , two-tailed unpaired t test. In **f**: n.s.  $P = 0.5095$ , two-tailed unpaired t test. n.s., not significant.

**Supplementary Figure 11.**

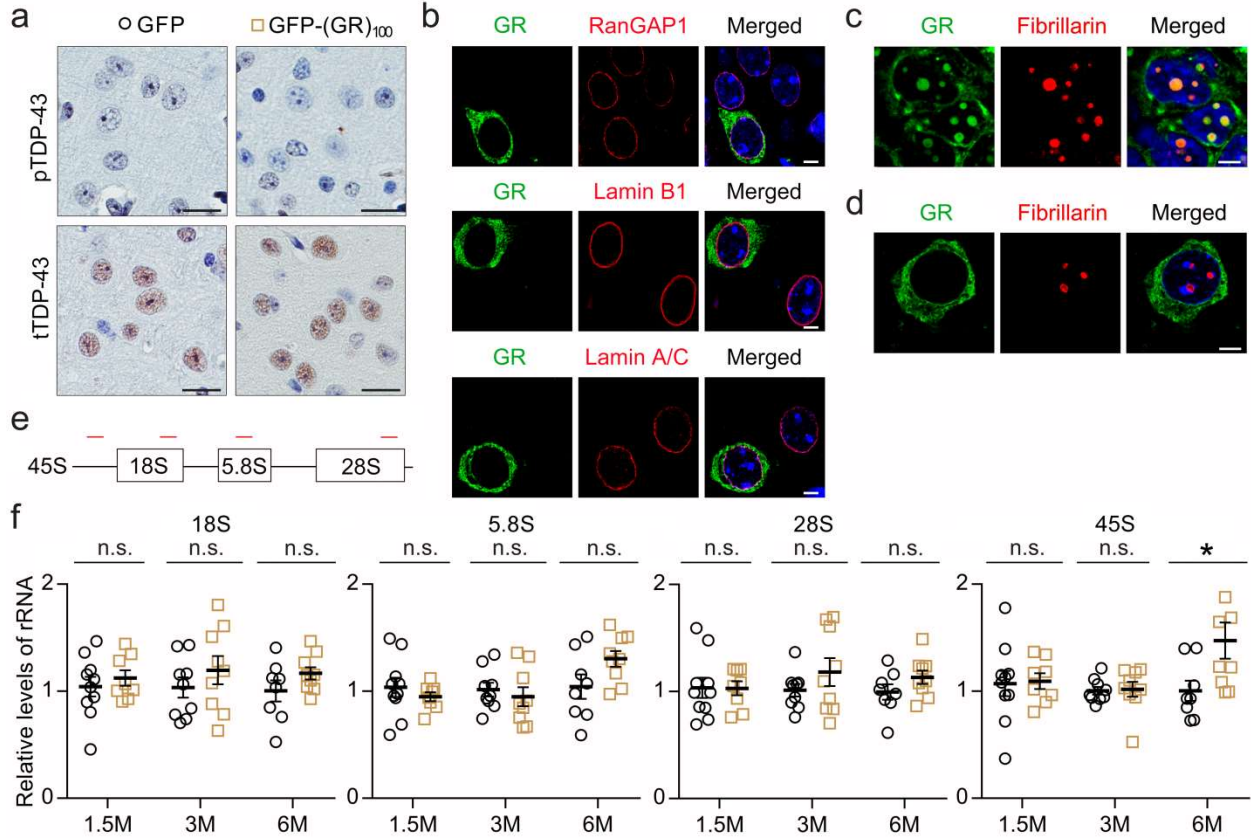

**Supplementary Figure 11. Expression of GFP-(GR)<sub>100</sub> in mice did not cause TDP-43**

**pathology, impaired nuclear membrane integrity or nucleolar stress. (a)**

Immunohistochemical analysis using antibodies to detect TDP-43 phosphorylated at serine residues 409 and 410 (pTDP-43) or total TDP-43 (tTDP-43) in the cortex of 6-month-old mice expressing GFP or GFP-(GR)<sub>100</sub> ( $n = 5$  per group). Scale bars, 20  $\mu$ m. **(b)** Double-immunofluorescence staining for GFP-(GR)<sub>100</sub> and RanGAP1, lamin B1 or lamin A/C in the cortex of 6-month-old mice expressing GFP-(GR)<sub>100</sub> ( $n = 5$ ). Scale bar, 5  $\mu$ m. **(c,d)** Double-immunofluorescence staining for GFP-(GR)<sub>100</sub> and the nucleolar marker fibrillarin in HEK293T cells **(c,  $n = 3$  independent experiments)** or in the cortex of 6-month-old mice expressing GFP-(GR)<sub>100</sub> **(d,  $n = 5$ )**. Scale bar, 5  $\mu$ m. **(e)** Schematic representation of ribosomal RNA (rRNA) and the regions to which primers were designed for quantitative real-time PCR analysis (qPCR). **(f)**

qPCR analysis of relative levels of 45S, 18S, 5.8S and 28S rRNA in brains of 1.5-, 3- and 6 month-old mice expressing GFP ( $n = 10, 9, 8$ , respectively) or GFP-(GR)<sub>100</sub> ( $n = 8, 9, 9$ , respectively). Data are presented as mean $\pm$ s.e.m. In **f**: \*  $P = 0.0363$  and n.s. (left to right)  $P = 0.9905, P = 0.8210, P = 0.8361, P = 0.9730, P = 0.9916, P = 0.2512, P > 0.9999, P = 0.7280, P = 0.8771, P > 0.9999$  and  $P > 0.9999$ , two-way ANOVA, Tukey's multiple-comparison test. n.s., not significant.



## Supplementary Figure 12.

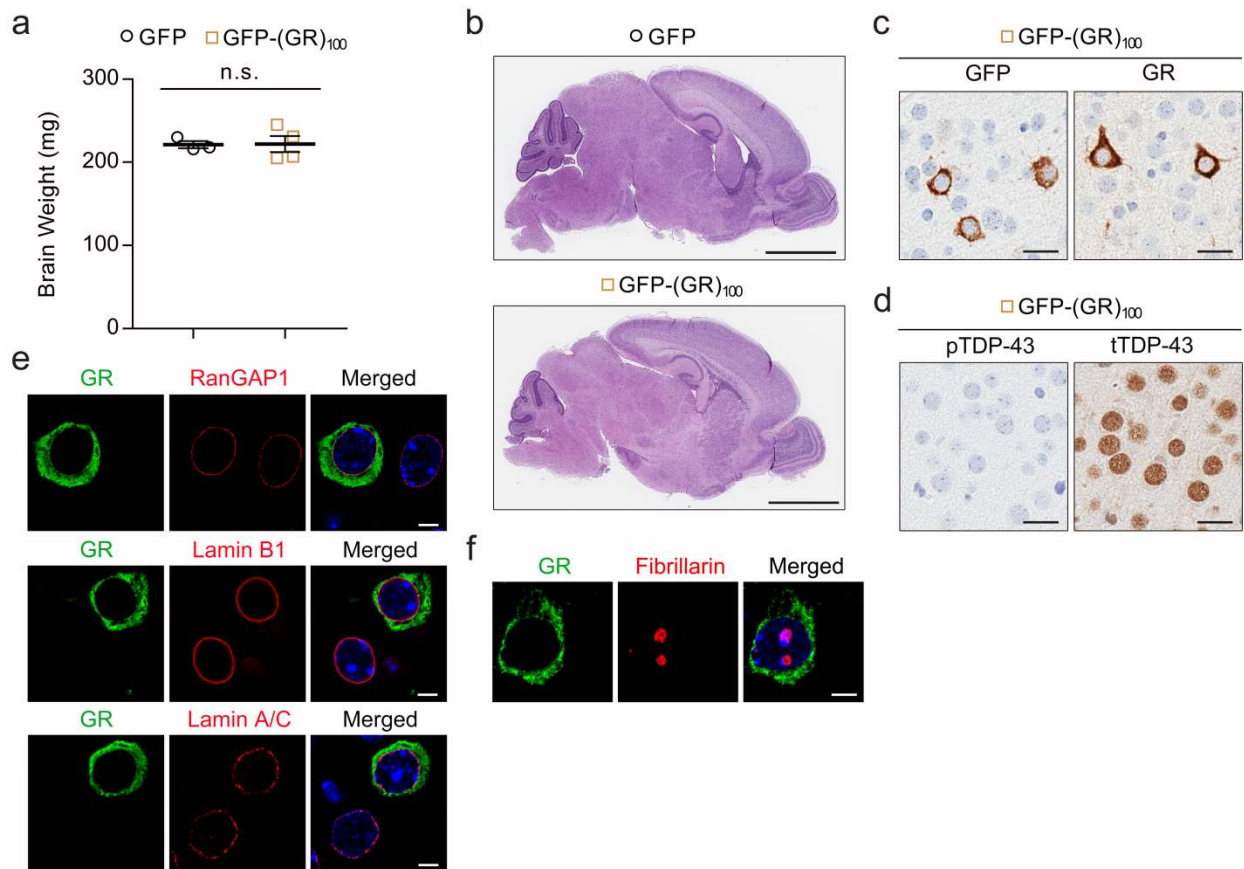

**Supplementary Figure 12. Characterization of the cellular distribution of GFP-(GR)<sub>100</sub>, TDP-43 pathology, and nuclear membrane integrity in 1-week-old GFP-(GR)<sub>100</sub> mice.** (a) Mean brain weight of 1-week-old mice expressing GFP ( $n = 3$ ) or GFP-(GR)<sub>100</sub> ( $n = 4$ ). (b) Gross morphological analysis with hematoxylin and eosin staining of brains from 1-week-old mice expressing GFP ( $n = 3$ ) or GFP-(GR)<sub>100</sub> ( $n = 4$ ). Scale bar, 2 mm. (c) Immunohistochemical analysis using antibodies to detect GFP or poly(GR) in the cortex of 1-week-old mice expressing GFP-(GR)<sub>100</sub> ( $n = 4$ ). Scale bars, 20  $\mu$ m. (d) Immunohistochemical analysis using antibodies to detect TDP-43 phosphorylated at serine residues 409 and 410 (pTDP-43) or total TDP-43 (tTDP-43) in the cortex of 1-week-old mice expressing GFP-(GR)<sub>100</sub> ( $n = 4$ ). Scale bars, 20  $\mu$ m. (e) Double-immunofluorescence staining for GFP-(GR)<sub>100</sub> and

RanGAP1, lamin B1 or lamin A/C in the cortex of 1-week-old mice expressing GFP-(GR)<sub>100</sub> ( $n = 4$ ). Scale bar, 5  $\mu\text{m}$ . (f) Double-immunofluorescence staining for GFP-(GR)<sub>100</sub> and the nucleolar marker fibrillarin in the cortex of 1-week-old mice expressing GFP-(GR)<sub>100</sub> ( $n = 4$ ). Scale bar, 5  $\mu\text{m}$ . Data are presented as mean $\pm$ s.e.m. In **a**: n.s.  $P = 0.9579$ , two-tailed unpaired t test. n.s., not significant.

**Supplementary Table 1a. cDNA sequence of the GFP-(GR)<sub>100</sub> plasmid**

---

ATGGTGAGCAAGGGCGAGGAGCTGTTACCGGGGTGGTGCCCATCCTGGTTCGAGCT  
GGACGGCGACGTAAACGGCCACAAGTTCAGCGTGTCCGGCGAGGGCGAGGGCGAT  
GCCACCTACGGCAAGCTGACCCTGAAGTTCATCTGCACCACCGGCAAGCTGCCCGTG  
CCCTGGCCCACCCTCGTGACCACCCTGACCTACGGCGTGCAGTGCTTCAGCCGCTAC  
CCCGACCACATGAAGCAGCACGACTTCTTCAAGTCCGCCATGCCCCGAAGGCTACGTC  
CAGGAGCGCACCATCTTCTTCAAGGACGACGGCAACTACAAGACCCGCGCCGAGGT  
GAAGTTCGAGGGCGACACCCTGGTGAACCGCATCGAGCTGAAGGGCATCGACTTCA  
AGGAGGACGGCAACATCCTGGGGCACAAGCTGGAGTACAACACTACAACAGCCACAA  
CGTCTATATCATGGCCGACAAGCAGAAGAACGGCATCAAGGTGAACTTCAAGATCC  
GCCACAACATCGAGGACGGCAGCGTGCAGCTCGCCGACCACTACCAGCAGAACACC  
CCCATCGGCGACGGCCCCGTGCTGCTGCCCCGACAACCACTACCTGAGCACCCAGTCC  
GCCCTGAGCAAAGACCCCAACGAGAAGCGCGATCACATGGTCCTGCTGGAGTTCGT  
GACCGCCGCCGGGATCACTCTCGGCATGGACGAGCTGTACAAGTCCGGACTCAGAT  
CTCGAGCTCAAGCTTCGGGCCGCGGCCGTGGTCGCGGTCGTGGACGCTGGCCCGTGGC  
CGTGGCCGAGGTCGCGGTCGGGGACGTGGCCGTGGTCGTGGCCGAGGTCGAGGTCG  
CGGACGTGGACGTCGAGGTCGGGGACGTGGACGAGGCCGTGGTCGTGGCCGAG  
GTCGCGGACGTGGGGCAGGTCGCGGTCGAGGCCGGGGACGTGGCCGTGGTCGTGGA  
CGGGGACGGGGTCGGGGACGCGGTCGAGGCCGTGGACGTGGACGGGGTCGAGGAC  
GTGGACGTGGTCGTGGACGTGGCCGTGGACGTGGACGCGGCCGTGGTCGCGGTCGT  
GGACGTGGCCGTGGCCGTGGCCGAGGTCGCGGTCGGGGACGTGGCCGTGGTCGTGG  
CCGAGGTCGAGGTCGCGGACGTGGACGTGGTCGAGGTCGGGGACGTGGACGAGGCC  
GTGGTCGTGGCCGAGGTCGCGGACGTGGGCGAGGTCGCGGTCGAGGCCGGGGACGT  
GGCCGTGGTCGTGGACGGGGACGGGGTCGGGGACGCGGTCGAGGCCGTGGACGTGG  
ACGGGGTCGAGGACGTGGACGTGGTCGTGGACGTGGCCGTGGACGTGGACGGTAG

---

The (GR)<sub>100</sub> sequence is highlighted in yellow.

**Supplementary Table 1b. Primary antibodies for immunohistochemistry and immunofluorescence staining**

| <b>Antibody</b>   | <b>Species</b> | <b>Dilution</b> | <b>Number</b>       | <b>Company</b>           |
|-------------------|----------------|-----------------|---------------------|--------------------------|
| anti-GFP          | rabbit         | 1:1000          | A-6455              | Life Technologies        |
| anti-GFP          | mouse          | 1:2000          | 33-2600             | Thermo Fisher Scientific |
| anti-GR           | rabbit         | 1:2000          | Rb7810 <sup>a</sup> |                          |
| anti-NeuN         | mouse          | 1:5000          | MAB377              | Chemicon International   |
| anti-GFAP         | rabbit         | 1:2500          | PU020-UP            | Biogenex                 |
| anti-Iba1         | rabbit         | 1:3000          | 019-19741           | Wako Chemicals           |
| anti-Fibrillarlin | mouse          | 1:1000          | ab4566              | Abcam                    |
| anti-GA           | mouse          | 1:1000          | MABN889             | EMD Millipore            |
| anti-S6           | mouse          | 1:100           | 2317S               | Cell Signaling           |
| anti-L21          | mouse          | 1:100           | sc-393663           | Santa Cruz Biotechnology |
| anti-eIF3 $\eta$  | goat           | 1:200           | sc-16377            | Santa Cruz Biotechnology |
| anti-eIF3 $\eta$  | mouse          | 1:200           | sc-137214           | Santa Cruz Biotechnology |
| anti-S25          | rabbit         | 1:100           | NBP1-80802          | Novus Biologicals        |
| anti-Tom20        | mouse          | 1:200           | sc-17764            | Santa Cruz Biotechnology |
| anti-KDEL         | mouse          | 1:250           | SPA-827             | Stressgen                |
| anti-TIA-1        | goat           | 1:100           | sc-1751             | Santa Cruz Biotechnology |
| anti-puromycin    | mouse          | 1:1000          | MABE342             | EMD Millipore            |
| anti-TDP-43       | rabbit         | 1:2000          | 12892-1-AP          | Proteintech              |
| anti-pTDP-43      | rabbit         | 1:1000          | Rb3655 <sup>b</sup> |                          |
| anti-RanGAP1      | rabbit         | 1:100           | sc-25630            | Santa Cruz Biotechnology |
| anti-Lamin B1     | rabbit         | 1:100           | ab133741            | Abcam                    |
| anti-Lamin A/C    | goat           | 1:100           | sc-6215             | Santa Cruz Biotechnology |

<sup>a</sup>Antibody described in: Gendron, T.F., *et al.* Antisense transcripts of the expanded C9ORF72 hexanucleotide repeat form nuclear RNA foci and undergo repeat-associated non-ATG translation in c9FTD/ALS. *Acta Neuropathol.* 126, 829-844 (2013).

<sup>b</sup>Antibody described in: Chew, J., *et al.* Neurodegeneration. C9ORF72 repeat expansions in mice cause TDP-43 pathology, neuronal loss, and behavioral deficits. *Science.* 348, 1151-1154 (2015).

**Supplementary Table 1c. Primers**

| <b>Model</b>           | <b>Target</b> | <b>Primers</b>                                             |
|------------------------|---------------|------------------------------------------------------------|
| mouse brain            | 45S rRNA      | 5'-GAGTTCACGGTGGGTTCG-3'<br>5'-GAGAAGACCACGCCAACG-3'       |
| mouse brain            | 18S rRNA      | 5'-GTAACCCGTTGAACCCATT-3'<br>5'-CCATCCAATCGGTAGTAGCG-3'    |
| mouse brain            | 5.8S rRNA     | 5'-CTCGTGCGTCGATGAAGAA-3'<br>5'-TCGAAGTGTCGATGATCAATGT-3'  |
| mouse brain            | 28S rRNA      | 5'-ATATCCGCAGCAGGTCTCC-3'<br>5'-GCCGACTTCCCTTACCTACA-3'    |
| mouse brain            | <i>GFP</i>    | 5'-GAAGCGCGATCACATGGT-3'<br>5'-CCATGCCGAGAGTGATCC-3'       |
| mouse brain            | <i>Gfap</i>   | 5'-GGAGAGGGACAACCTTGCAC-3'<br>5'-AGCCTCAGGTTGGTTTCATC-3'   |
| mouse brain            | <i>Ibal</i>   | 5'-GGATTTGCAGGGAGGAAAAG-3'<br>5'-TGGGATCATCGAGGAATTG-3'    |
| mouse brain            | <i>Gadph</i>  | 5'-CATGGCCTTCCGTGTTCTTA-3'<br>5'-CCTGCTTCACCACCTTCTTGAT-3' |
| cultured HEK293T cells | <i>C9-66R</i> | 5'-TACAGCTCCTGGGCAACG-3'<br>5'-CTTGTTACCCCTCAGCGAGT-3'     |
| cultured HEK293T cells | <i>GAPDH</i>  | 5'-GTTCGACAGTCAGCCGCATC-3'<br>5'-GGAATTTGCCATGGGTGGA-3'    |

**Supplementary Table 2. Patient Characteristics**

| <b>Case #</b> | <b>Pathological Diagnosis</b> | <b>Gender</b> | <b>Age at Onset</b> | <b>Age at death</b> | <b>Disease Duration</b> | <b><i>C9orf72</i> repeat expansion</b> |
|---------------|-------------------------------|---------------|---------------------|---------------------|-------------------------|----------------------------------------|
| 1             | FTD                           | Male          | 63                  | 66                  | 3.1                     | Yes                                    |
| 2             | FTD                           | Male          | 55                  | 61                  | 6.2                     | Yes                                    |
| 3             | FTD                           | Male          | n.a.                | 64                  | n.a.                    | Yes                                    |
| 4             | FTD                           | Male          | 68                  | 73                  | 5.9                     | Yes                                    |
| 5             | FTD                           | Male          | n.a.                | 65                  | n.a.                    | Yes                                    |
| 6             | FTD                           | Male          | n.a.                | 66                  | n.a.                    | Yes                                    |
| 7             | ALS                           | Female        | 41                  | 42                  | 1.3                     | Yes                                    |
| 8             | FTD-ALS                       | Female        | n.a.                | 51                  | n.a.                    | Yes                                    |
| 9             | FTD-ALS                       | Female        | 49                  | 52                  | 2.7                     | Yes                                    |
| 10            | ALS                           | Female        | 48                  | 49                  | 1.1                     | Yes                                    |
| 11            | FTD                           | Female        | 44                  | 56                  | 12.2                    | Yes                                    |
| 12            | FTD-ALS                       | Female        | 52                  | 60                  | 8.3                     | Yes                                    |
| 13            | FTD                           | Male          | 55                  | 63                  | 8.6                     | Yes                                    |
| 14            | FTD                           | Male          | 63                  | 67                  | 3.9                     | No                                     |
| 15            | FTD                           | Female        | 79                  | 87                  | 8.3                     | No                                     |

FTD, frontotemporal degeneration; ALS, amyotrophic lateral sclerosis; n.a., not available;

Cases #1 to #8 were used for immunochemistry and immunofluorescence staining, and cases #9 to #15 were used for immunoassay.
